# Supplementary material for: The Role of Cellular Senescence in Cyclophosphamide-Induced Primary Ovarian Insufficiency
Source: MDPI journal article supplement (doi:10.3390/ijms242417193), 2023-12-06
Supplement: s1 [file s1]

## **Supplementary Information**

### **The role of cellular senescence in cyclophosphamide-induced primary ovarian insufficiency**

Zixin Xu et al.

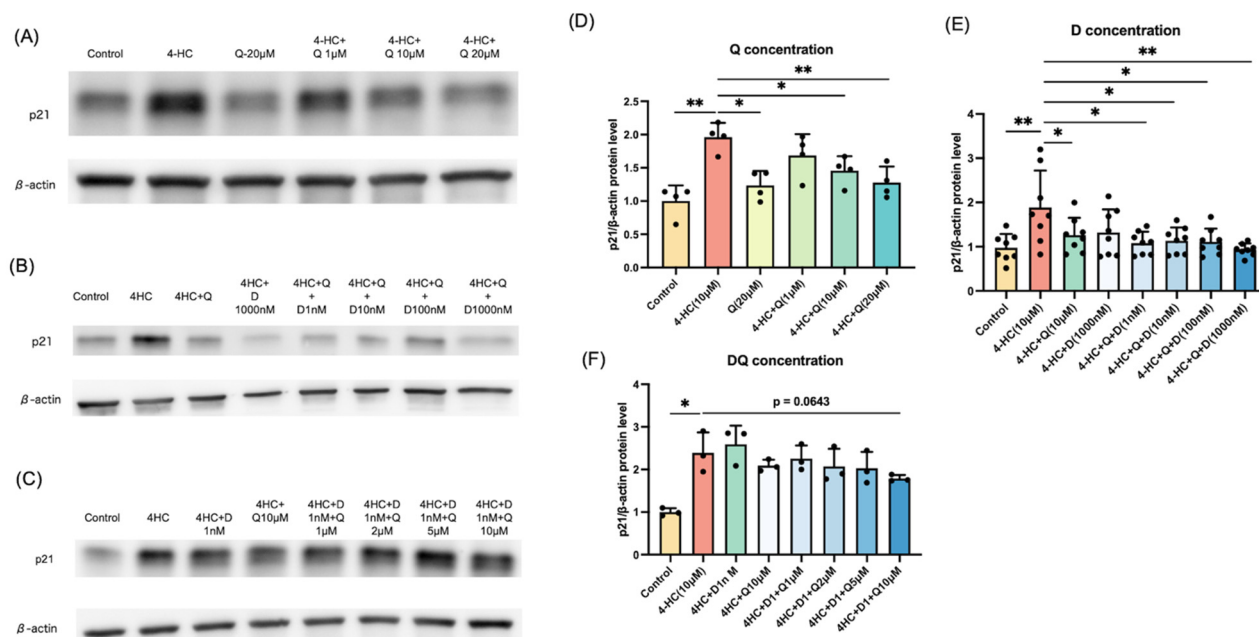

**Supplementary Figure S1.** Determination of the optimal concentrations of DQ. **(A, D)** Human GLCs were pretreated with 1, 10, and 20  $\mu$ M quercetin for 24 h before administration of 4-HC. **(B, E)** Human GLCs were pretreated with 10  $\mu$ M quercetin and 1, 10, 100, and 1000 nM dasatinib for 24 h before administration of 4-HC. **(C, F)** Human GLCs were pretreated with 1 nM dasatinib and 1, 2, 5, and 10  $\mu$ M quercetin for 24 h before administration of 4-HC. Protein expression of p21 in human GLCs was analyzed by western blotting.  $\beta$ -actin was used as a loading control. Representative images are shown in A–C. Quantitative analysis of western blotting is shown in D–F. Values represent mean  $\pm$  SD. Student's *t*-test was used for statistical analysis. \*  $p < 0.05$  and \*\*  $p < 0.01$  compared with the 4-HC-treated group. D, dasatinib; Q, quercetin.
